# Supplementary material for: Prediction of Toxicant-Specific Gene Expression Signatures after Chemotherapeutic Treatment of Breast Cell Lines
Source: PubMed Central journal article supplement (PMC1247657; doi:10.1289/txg.7204), 2004-09-14
Supplement: ehp0112-001607s1.pdf [file ehp0112-001607s1.pdf]

**Supplemental Data, Figure 1.** The complete hierarchical cluster diagram for the toxicant-specific gene expression patterns of luminal epithelium derived cell lines (MCF-7 and ZR-75-1).

**Supplemental Data, Figure 2.** The complete hierarchical cluster diagram for the toxicant-specific gene expression patterns of basal-like cell lines (ME16C and HME-CC).

**Supplemental Data, Figure 3.** The complete hierarchical cluster diagram for 100 genes selected using a k-nearest neighbors metric to classify samples by treatment. All four cell lines and three treatments (5FU, DOX, and ETOP) are represented.



Supplemental Data, Figure 2



Troester, M.A. et al.; Prediction of Toxicant-Specific Gene Expression Signatures Following Chemotherapeutic Treatment of Breast Cell Lines

Supplemental Data, Figure 3



HME-CC, 36h 5FU B  
 HME-CC, 24h 5FU B  
 HME-CC, 24h 5FU B  
 ME16C, 12h 5FU B  
 HME-CC, 12h 5FU B  
 HME-CC, 12h 5FU B  
 HME-CC, 12h 5FU B  
 MCF-7, 12h 5FU B  
 MCF-7, 12h 5FU B  
 ME16C, 36h 5FU B  
 ME16C, 36h 5FU B  
 ZR-75-1, 12h 9FU B  
 ZR-75-1, 12h 9FU C  
 ZR-75-1, 24h 5FU B  
 ZR-75-1, 24h 5FU B  
 ZR-75-1, 36h 5FU B  
 ME16C, 24h 5FU B  
 MCF-7, 24h 5FU B  
 MCF-7, 36h 5FU B  
 MCF-7, 36h 5FU B  
 MCF-7, 24h 5FU B  
 ZR-75-1, 12h 5FU B  
 ME16C, 24h 5FU B  
 HME-CC, 36h 5FU B  
 MCF-7, 36h ETOP  
 ZR-75-1, 12h DOX B  
 MCF-7, 24h DOX B  
 MCF-7, 24h DOX B  
 ME16C, 36h ETOP  
 MCF-7, 12h ETOP  
 ME16C, 24h DOX B  
 ME16C, 36h DOX C  
 ME16C, 36h DOX B  
 HME-CC, 24h DOX B  
 HME-CC, 24h DOX C  
 HME-CC, 36h DOX C  
 HME-CC, 36h DOX B  
 HME-CC, 36h ETOP  
 MCF-7, 36h DOX  
 MCF-7, 36h DOX B  
 MCF-7, 36h DOX C  
 MCF-7, 12h DOX B  
 MCF-7, 12h DOX  
 ZR-75-1, 24h DOX  
 HME-CC, 12h DOX B  
 HME-CC, 12h DOX  
 ME16C, 12h DOX  
 ME16C, 12h DOX  
 HME-CC, 12h DOX B  
 HME-CC, 12h ETOP  
 ZR-75-1, 12h DOX  
 ZR-75-1, 12h ETOP  
 ZR-75-1, 36h ETOP  
 ZR-75-1, 36h DOX  
 ME16C, 24h DOX B



PTD011 protein NM\_014051  
 ubiquitin fusion degradation 1-like NM\_005659  
 tyrosine kinase, non-receptor, 1 NM\_003985  
 carnitine palmitoyltransferase I, muscle NM\_004377  
 retinoblastoma binding protein 6 NM\_006910  
 seven transmembrane protein TM7SF3 NM\_016551  
 D28449  
 inhibitor of DNA binding 3, domit negative helix-loop-helix protein AA482119  
 KIAA0339 gene product AB002337  
 cysteine-rich protein 2 NM\_001312  
 ATP-binding cassette, sub-family F GCN20, member 1 AF027302  
 protein phosphatase 2 formerly 2A, regulatory subunit B PR 52, alpha isoform NM\_002717  
 sialic acid binding Ig-like lectin 9 AF227924  
 mucopolipin-3 NM\_018298  
 hypothetical protein FLJ10774 AK022241  
 microfibrillar-associated protein 1 NM\_005926  
 DnaJ Hsp40 homolog, subfamily C, member 5 AK024508  
 mitogen-activated protein kinase 6 AA603152  
 testis derived transcript 3 LIM domains NM\_015641  
 hypothetical protein FLJ20039 NM\_017635  
 AK025859  
 KIAA0697 protein AB014597  
 phosphatase and tensin homolog mutated in multiple advanced cancers 1 NM\_000314  
 AK024752  
 phosphofructokinase, muscle NM\_000289  
 hypothetical protein FLJ20552 NM\_017876  
 isocitrate dehydrogenase 3 NAD+ gamma NM\_004135  
 palladin NM\_016081  
 CCCTC-binding factor zinc finger protein NM\_006565  
 splicing factor 30, survival of motor neuron-related NM\_005871  
 RAB10, member RAS oncogene family NM\_016131  
 jumonji homolog mouse NM\_004973  
 protein kinase C binding protein 1 AK026151  
 protein phosphatase 1, regulatory subunit 10 NM\_002714  
 tousled-like kinase 2 AF162667  
 KIAA1025 protein AL133033  
 Yes-associated protein 1, 65 kD NM\_006106  
 nuclear receptor co-repressor/HDAC3 complex subunit AK022956  
 acetyl-Coenzyme A transporter NM\_004733  
 D17216  
 glutathione transferase zeta 1 maleylacetoacetate isomerase NM\_001513  
 AF076617  
 Homo sapiens cDNA: FLJ22572 fis, clone HSI02313 AK026225  
 polymerase DNA-directed, delta 4 AF179890  
 chromosome 20 open reading frame 81 AL442086  
 SH3-domain GRB2-like endophilin B2 NM\_020145  
 thiosulfate sulfurtransferase rhodanese NM\_003312  
 low density lipoprotein receptor-related protein 5 NM\_002335  
 hypothetical protein FLJ21044 similar to Rbig1 AK024697  
 ribosomal protein L12 AK026491  
 ribosomal protein L10a NM\_007104  
 phospholipase C, beta 4 NM\_000933  
 cerebral cell adhesion molecule NM\_016174  
 brain acyl-CoA hydrolase NM\_007274  
 AF275804  
 cell division cycle 25B NM\_004358  
 histone deacetylase 6 NM\_006044  
 tumor protein p53 Li-Fraumeni syndrome NM\_000546  
 tumor protein p53 Li-Fraumeni syndrome NM\_000546  
 tumor protein p53 Li-Fraumeni syndrome NM\_000546  
 transformer-2 alpha htra-2 alpha NM\_013293  
 actin related protein 2/3 complex, subunit 4 20 kD NM\_005718  
 catenin cadherin-associated protein, beta 1 88kD NM\_001904  
 nuclear transport factor 2 NM\_005796  
 integral membrane protein 1 NM\_002219  
 coat protein gamma-cop AF100756  
 kinesin family member 1B AB011163  
 heterogeneous nuclear ribonucleoprotein H1 H NM\_005520  
 U5 snRNP-specific 40 kDa protein hPrp8-binding NM\_004814  
 NM\_016259  
 chromosome 2 open reading frame 6 NM\_018221  
 CGI-90 protein NM\_016033  
 galactose-4-epimerase, UDP- NM\_000403  
 transmembrane protein 4 NM\_014255  
 TAF12 RNA polymerase II, TATA box binding protein TBP-associated factor, 20 kD NM\_005644  
 leukotriene A4 hydrolase NM\_000895  
 beclin 1 coiled-coil, myosin-like BCL2 interacting protein NM\_003766  
 NAD kinase AK023114  
 Homo sapiens mRNA; cDNA DKFZp434A1422 from clone DKFZp434A1422 AL137705  
 F-box and leucine-rich repeat protein 6 AK026541  
 hypothetical protein FLJ10535 NM\_018129  
 F-box only protein 22 AK024048  
 annexin A4 NM\_001153  
 Homo sapiens clone CDABP0028 mRNA sequence AY007126  
 NADH dehydrogenase ubiquinone 1 alpha subcomplex, 7 14.5kD, B14.5a NM\_005001  
 polymerase RNA II DNA directed polypeptide H U37689  
 cystatin C amyloid angiopathy and cerebral hemorrhage AA599177  
 cathepsin L NM\_001912  
 egl nine homolog 3 C. elegans R00226  
 D17222  
 transketolase Wernicke-Korsakoff syndrome NM\_001064  
 hypothetical protein MGC16063 AK024535  
 Homo sapiens clone CDABP0071 mRNA sequence AY007143  
 solute carrier family 25 mitochondrial carrier, phosphate carrier, member 3 NM\_002635  
 FK506 binding protein 3 25kD NM\_002013  
 stromal cell protein NM\_018845  
 D17082  
 leucine carboxyl methyltransferase NM\_016015  
 protein tyrosine phosphatase, receptor type, G NM\_002841  
 UMP-CMP kinase NM\_016308

Table 1. Results of Cross-Validation (CV) Analyses Using 2-Class PAM Method

| Delta Value | Average No. of Genes | Average CV Accuracy (%) |
|-------------|----------------------|-------------------------|
| 4           | 1123.1               | 64                      |
| 3.5         | 1928.3               | 76                      |
| 3           | 2323.6               | 78                      |
| 2.75        | 2460.4               | 80                      |
| 2.5         | 2584.6               | 76                      |
| 2.25        | 2706.8               | 76                      |
| 2           | 2829.4               | 76                      |
| 1.75        | 2948                 | 76                      |
| 1.5         | 3075                 | 76                      |
| 1.25        | 3213.9               | 76                      |
| 1           | 3371.1               | 74                      |
| 0.75        | 3543                 | 70                      |
| 0.5         | 3716.2               | 70                      |
| 0.25        | 3902.5               | 70                      |
| 0           | 4077                 | 70                      |

Table 2. Cross-Validation (CV) Accuracy (%) Using 2-Class KNN Method

| Number of Genes | k= | 1  | 3  | 5  | 7  | 9  | 11 |
|-----------------|----|----|----|----|----|----|----|
| 10              |    | 58 | 72 | 72 | 66 | 66 | 64 |
| 30              |    | 84 | 92 | 90 | 92 | 94 | 94 |
| 50              |    | 74 | 80 | 90 | 96 | 94 | 92 |
| 70              |    | 80 | 86 | 92 | 92 | 90 | 92 |
| 100             |    | 80 | 82 | 94 | 94 | 96 | 98 |
| 200             |    | 74 | 76 | 86 | 88 | 88 | 90 |
| 4077            |    | 66 | 64 | 70 | 68 | 68 | 76 |

Table 3. Results of Cross-Validation (CV) Analyses Using 4-Class PAM Method

| Delta Value | Average No. of Genes | Average CV Accuracy (%) |
|-------------|----------------------|-------------------------|
| 6           | 17.4                 | 66                      |
| 5           | 45.6                 | 68                      |
| 4           | 136.9                | 76                      |
| 3.5         | 652                  | 76                      |
| 3           | 1830.7               | 50                      |
| 2.75        | 2211.2               | 46                      |
| 2.5         | 2510.9               | 42                      |
| 2.25        | 2763.2               | 48                      |
| 2           | 2975.5               | 48                      |
| 1.75        | 3183.5               | 48                      |
| 1.5         | 3379.4               | 48                      |
| 1.25        | 3549.1               | 46                      |
| 1           | 3693.8               | 46                      |
| 0.75        | 3826.3               | 46                      |
| 0.5         | 3944.6               | 46                      |
| 0.25        | 4037.7               | 42                      |
| 0           | 4077                 | 38                      |

Table 4. Cross-Validation (CV) Accuracy (%) Using 4-Class KNN Method

| Number of Genes | k= | 1  | 3  | 5  | 7  | 9  | 11 |
|-----------------|----|----|----|----|----|----|----|
| 10              |    | 40 | 50 | 48 | 54 | 56 | 56 |
| 30              |    | 60 | 62 | 76 | 76 | 72 | 76 |
| 50              |    | 66 | 78 | 74 | 70 | 70 | 74 |
| 70              |    | 62 | 74 | 76 | 76 | 78 | 68 |
| 100             |    | 58 | 66 | 70 | 70 | 80 | 78 |
| 200             |    | 54 | 58 | 64 | 62 | 76 | 74 |
| 4077            |    | 48 | 48 | 48 | 46 | 48 | 52 |
